# Supplementary material
Source: Springer Nature journal article supplement (http://www.springermedizin.de/resource/supplementary/12885_2009_1885_MOESM3_ESM.pdf/9461490)
Supplement: MOESM3 [file 9461490]

Table1 - Patients Characteristics

| <b>Character</b>          |                           | <b>Range</b> |
|---------------------------|---------------------------|--------------|
| <b>N=</b>                 | 32                        |              |
| <b>Histology</b>          | Pancreatic Adenocarcinoma |              |
| <b>Metastatic disease</b> | 32/32                     |              |
| <b>BMI</b>                | 19.7                      | 14.4 to 25.0 |
| <b>Phase angle</b>        | 3.6                       | 2.3 to 5.1   |
| <b>ECM/ BCM</b>           | 1.7                       | 1.1 to 3.1   |

Table2 – Assessment of nutritional status

| <b>Parameter</b>      | <b>Improvement</b> | <b>Stabilisation</b> | <b>Worsening</b> |
|-----------------------|--------------------|----------------------|------------------|
| <b>BMI</b>            | > + 5%             | +/- 5%               | > - 5%           |
| <b>ECM/ BCM-Index</b> | > - 5%             | +/- 5%               | > + 5%           |
| <b>Phase angle</b>    | > + 5%             | +/- 5%               | > - 5%           |
